# Supplementary material
Source: publisher site journal article supplement (https://www.dovepress.com/article/390127)
Supplement: Supplementary file 1 [file get_supplementary_file.php]

| **Table S1.** Study inclusion and exclusion criteria |
| --- |
| **Inclusion criteria** |
| 1. Age 18 years or older |
| 2. Patients had de novo CRTs |
| 3. Patients had no prior pacemakers or implantable cardioverter defibrillators |
| **Exclusion criteria** |
| 1. Patients who failed the operation, or died in hospital |
| 2. Missing information on baseline AF and statin |
| 3. Loss of follow-up |
